# Supplementary material for: Parvovirus B19 and Human Parvovirus 4 Encode Similar Proteins in a Reading Frame Overlapping the VP1 Capsid Gene
Source: MDPI journal article supplement (doi:10.3390/v16020191), 2024-01-26

S3

A. Splicing profile of Parvovirus B19

P6: promoter  
D1, D2: splicing donor sites  
A1-1, A1-2, A2-1, A2-2: splicing acceptor sites  
pAp1, pAp: proximal poly-adenylation sites  
pAd: distal poly-adenylation site

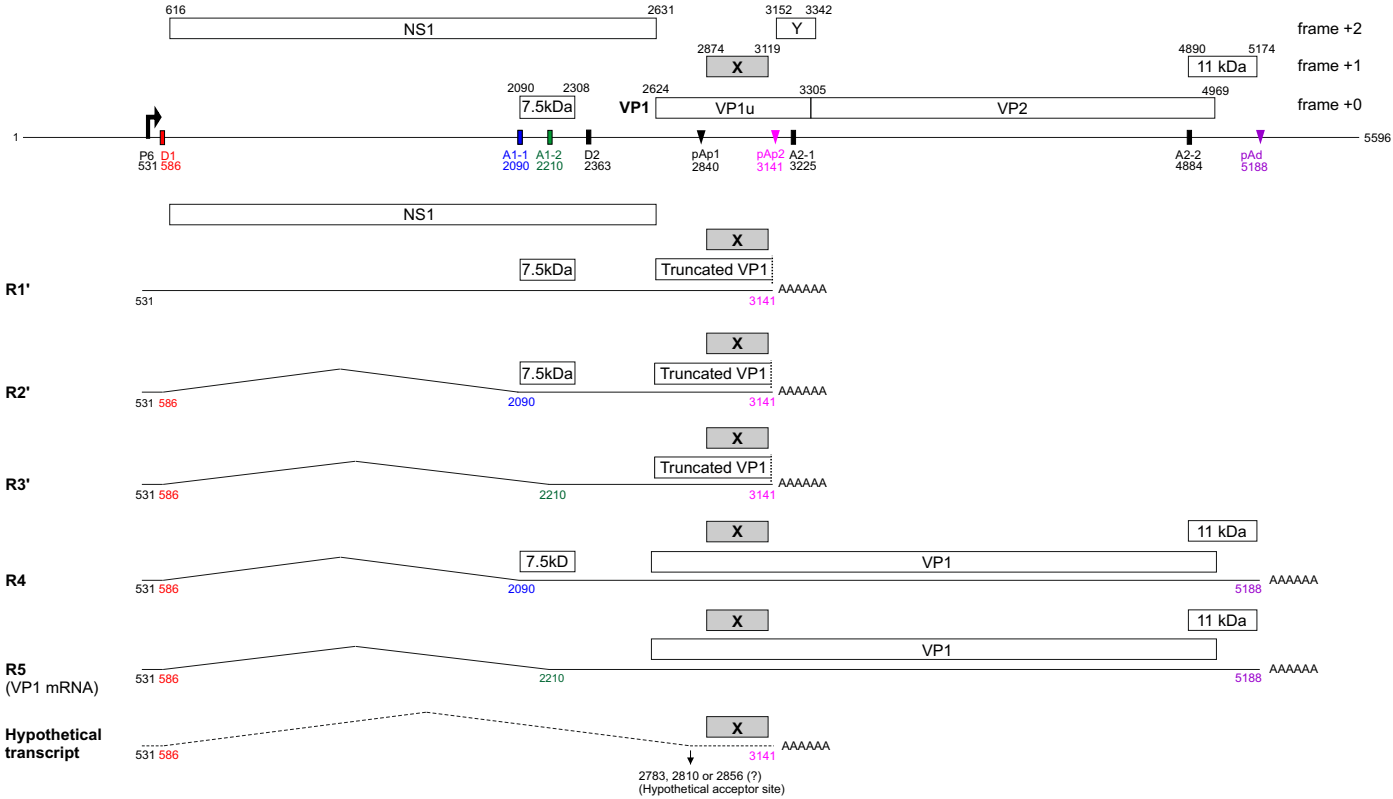

B. Splicing profile of Human parvovirus 4

P6, P38: promoters  
D1, D2, D3, D3m: splicing donor sites  
A1, A2, A3: splicing acceptor sites  
pA: poly-adenylation site

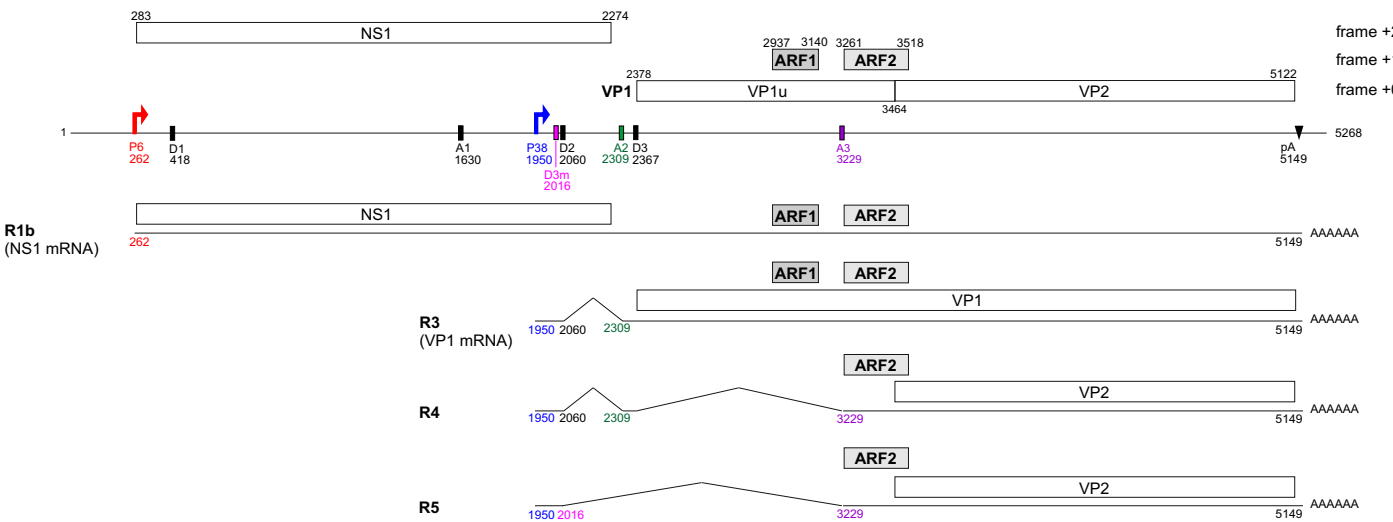

Supplement: s1 [file s1]
