# Supplementary material for: Parvovirus B19 and Human Parvovirus 4 Encode Similar Proteins in a Reading Frame Overlapping the VP1 Capsid Gene
Source: MDPI journal article supplement (doi:10.3390/v16020191), 2024-01-26
Supplement: s1 [file s1]

### S5 Alignment. The X and ARF1 ORFs have a potential AUG start codon in all erythro- and tetraparvoviruses, respectively

Codon-based nucleotide alignment of the region surrounding the start of the X ORF of erythroparvoviruses (panel A) and of the ARF1 ORF of tetraparvoviruses (panel B). These alignments are derived from the reference alignment of the VP1 protein using TranslatorX. Numbering corresponds to the VP1 CDS.

Putative AUG start codons are highlighted in yellow. For each species, the putative AUG start codon is conserved in all isolates (not shown in this alignment). Note how the AUGs tend to be in a similar location within erythroparvoviruses (except in chipmunk parvovirus and seal parvovirus), and within tetraparvoviruses.

**UAG** or **UGA**: stop codon

**AUG**: putative start codon of the X ORF

#### A. Erythroparvoviruses

|                     |     |                                                                                                                                                    |     |
|---------------------|-----|----------------------------------------------------------------------------------------------------------------------------------------------------|-----|
| Parvovirus B19      | 185 | <b>UAG</b> UUGCUCGCAUUAAAAUAACCUUAAAAAUUCCAGACUUAUAUAGUCAUUAUUCAAAGUC <b>AUG</b> GACAGUUAUCUGACCACCCCAU-----GCCUUAUCAUCCAGUAGCAGUCAUG              | 301 |
| Simian parvovirus   | 293 | ACCUUAAA---CAACAUUUACAAGACUAUAUAGACAAUCCAGAUAAAGUACACUU <b>UAG</b> ACUUGUCUC <b>AUG</b> GACCUCUCCAGAUUUCAGAGAA-----ACUGAGGCAGAACACAAAUCCUUUA       | 406 |
| Rhesus macaque      | 299 | AUCUACAA---AAACAAUUGAAAAACUAUAAAAUAAUCCAAACAAAUUAUACAUUACAGUUGUCUC <b>AUG</b> GACCUCUCCUGAUUUCAGAGAG-----UCUGAGGCACAAACAUAAUCCUCUA                 | 412 |
| Pigtailed macaque   | 194 | UGGUUAAU---CGCAUUAAAAAAAU <b>UAA</b> AGACAAUCCUGAUUUUACACUGACUCCUUAAGUC <b>AUG</b> GCGCUCUCCAGAUUUCGAGAA-----UCUAAGGCUGAGCAUGAGAAGUCUA             | 307 |
| Chipmunk parvovirus | 311 | CCGUAGCU---AACACAGCCAAGCGGU <b>UAA</b> AAACUGACGAGGAUCCCUA-----UCCUUUGGGGCCCCC <b>UAA</b> CAGAAAACGCCCCGGUUCGGUUGCGGAGCCAG <b>AUG</b> UGGCAAUUGUUU | 427 |
| Seal parvovirus     | 338 | GGAGGCACUAUGGAUCCUAAAGGAGCAGGGCGCAGCACCCCCCGCUGAUCCAGACAUA <b>UAG</b> CAGGCCCUCCUCACAUACAGGGCCG-----GUGUUGGGGAGC <b>AUG</b> UCCCUAUCA              | 454 |

#### B. Tetraparvoviruses

|                      |     |                                                                                                                                                                            |     |
|----------------------|-----|----------------------------------------------------------------------------------------------------------------------------------------------------------------------------|-----|
| Human parvovirus 4   | 467 | UUUUUGAA---GACUCGC <b>UAA</b> CGAACUUUGCCAAAGAAGACU <b>UAG</b> ACACCUGGCAACAACUCCACGAGCAGUUUAUCAAACUCUUUACCCU-----CCAG <b>AUG</b> UCGGAGUCCACCUUGUUA                       | 580 |
| Porcine hokovirus    | 464 | UCUUUGAG---GAGAGUGUAUCUCCUUGGUCUGAGGAAGACAAAAAAUU <b>UGA</b> AAACAGAUUGAAGGGCAGUUCAGGAAAUUUCCAUCCACCCACAGAUACGGAGG <b>AUG</b> GAGCCGAUAGCUACG                              | 586 |
| Yak hokovirus        | 491 | UUUUUCAG---GGCAUGUUAUCUCCAUCAAACCUGAAGAUAGACCUAU <b>UAG</b> ACACCAUACAGAAGCAGUUUGAGGAGUUUUUUUUAUCCUCCUA <b>UAG</b> UGGAAC <b>AUG</b> CUGGACCAGGCGACUACA                    | 613 |
| Deer tetraparvovirus | 491 | ACUUUGAU---GGCAUGUUGUACCUUAUCCAGUGGAACAACAUCCAAUUG <b>UAG</b> AGCAGAU <b>UAA</b> AGGCUCAGUUUU <b>UAA</b> AUAUUUUUUAUCCGCCACCUA <b>UAG</b> CUGGAG <b>AUG</b> GAGUCGGUGUGACG | 613 |
| Ovine hokovirus      | 491 | UUUUCAAU---GGUAUGUUGACGCCGUUGAUUCCGACCAGCGACCGUGGUCGAGCAGAUUACCCAGCAGUUCU <b>UAG</b> ACAUCUUUACCCCCCACCAGUGCAUGGCC <b>AUG</b> GCGGAGGUGUCGACA                              | 613 |
| Rodent tetraparvo    | 467 | ACUUUGAC---CAGUUCAUACCCCCGGUGGACCCCCGGGAGCCCGAGAUUC <b>UAA</b> AGCAGGCCUUCAGCGCAUGG <b>UAG</b> AAUAUUACCACCCCGCCCU---CAGG <b>AUG</b> GCGGACCUGUCUCCUCCCC                   | 586 |
| Eidolon parvovirus   | 458 | UUUUUGAU---GAGUCUGUGCUGGGCAGCGUUAGCGGAGACCCCGAAAACUUUGCUUUUGUGAAGCAGGCAG <b>UAG</b> UUAGUGCUUUUCAUCCUGCA-----G <b>AUG</b> GAGGAGCCGCUACUGAACAGC                            | 574 |
| Opposum tetraparvo   | 440 | UUUUUACU---GACUCUAUUAGUGCGGGUG <b>UAG</b> CUGGAACA---CCACUCUGGGGAGAUACUGCAGAAGCUCUCAUGUCGGCCCUU-----GCAGGGA <b>AUG</b> GAAGUAUCAGAGGGU                                     | 544 |
