# Supplementary material for: Parvovirus B19 and Human Parvovirus 4 Encode Similar Proteins in a Reading Frame Overlapping the VP1 Capsid Gene
Source: MDPI journal article supplement (doi:10.3390/v16020191), 2024-01-26
Supplement: s1 [file s1]

**Alignment S7: Sequence alignment of the PLA2 domain of representative erythro-, tetra-, copiparvo-, bocaparvo-, dependoparvo-, and protoparvoviruses.**

This alignment was used for the phylogenetic analysis of Fig 9.

```
>B19|YP_004928146.1/123-182 [Human parvovirus B19]
VQLPGTNYVGPNGELQAGPPQSAVDSAARIHDFRYSQ LAKLGINPY-THWTVADDEELLKNI
> Primate Erythroparvovirus 4|AAF61214.1/125-184 capsid protein [Pig-tailed
macaque parvovirus]
LTLPLTHYIGPGNPLQAGSPTDVVDAAARIHDYRSELIKLGINPY-THWTVADDEELLHNV
>Primate Erythroparvovirus 2|AAA74974.1/158-217 VP1 [Simian parvovirus]
LTLPPFSNYIGPGNQLQAGNPQSVVDAAARIHDFRYSSELIKLGINPY-THWSVADDEELLHNI
>PrimateErythro3|AAF61211.1/160-219 capsid protein [Rhesus macaque parvovirus]
VQLPFSHYIGPGNELQAGAPESVVDAAARSHDFRYSSELIKLGINPY-TQWTVADDEELLHNI
>Seal parvovirus|AHA86836.1/175-234 VP1 [Seal parvovirus]
LTLPGTHYVGPNGNRLEEGPPTRLDAEARIHDFRYSSELIKLGINPY-THFTSADQELLSSAA
>Chipmunk parvovirus|ACT09662.1/166-225 VP1 [Chipmunk parvovirus]
IHLPADRYLGPGNPLENGPPVDPVDAVARIHDFRYADLEKQGINPY-TTYTTIADDEELLKNI
>Bocaparvovirus primatel|YP_338088.1/11-70 VP1 [Bocaparvovirus primatel]
WVLPGYRYLGPFNPLDNGEPVNNADRAAQLHDHAYSELIKSGKNPY-LYFNKADEKFIDDL
>Rhinolophus Bocaparvovirus 2|YP_009553049.1/11-70 VP1/VP2 [Rhinolophus
pusillus bocaparvovirus 2]
WVVPGYKYLGPFNQLDAGEPVNKSDQAAQKHDFAYDQYIKSGKNPY-LYFNKADQDFIEDL
>Canine minute virus|NP_758523.1/11-70 virus protein 1 [Canine minute virus]
WVVPGYKYLGPFNPLDNGTPINKVDKAAQKHDFAYQSYINKGENPY-LNFNKADSDFIEDL
>Feline Bocaparvovirus 2|YP_008802582.1/11-70 VP1 [Feline bocaparvovirus 2]
WTVPGFKYLGPFNPLDNGDPVNEVDKTAQTHDRAYQSYIDAGINPY-LNFNKADSDFIESL
>Dromedary bocaparvovirus 1|YP_009389294.1/13-72 VP1 [Dromedary camel
bocaparvovirus 1]
ILFPGYNYLGPFNPLDNGEPVNKADKAAKRHDLAYNQYLNKGLNPY-LKFNKADQQLIDDL
>Canine bocavirus 3|YP_010802373.1/11-70 VP1 [Canine bocavirus 3]
WLFPGYKYLGPFNPLDNGEPVNKADSVAREHDLAYSKEYLEAGKNPY-LNFNKADQKFIDDL
>Rat bocavirus|YP_009227293.1/11-70 VP1 [Rat bocavirus]
WVLPGFKYLGPFNPIRSGKAKNRVDQAALRHDYAYDRYINNKNPNPY-FKFNKADQTFLNDL
>AAV2|YP_680426.1/45-104
LVLPGYKYLGPFNGLDKGEPVNEADAAALEHDKAYDRQLDSGDNPY-LKYNHADADEFQERL
>AAV12|DQ813647.1_cds_ABI16639.1_2/45-104
LVLPGYKYLGPFNGLDKGEPVNEADAAALEHDKAYDKQLEQGDNPY-LKYNHADADEFQQRL
>Bearded dragon parvovirus|YP_009154713/40-99
LVVPGYKYLGPFNGLDKGEPVNAADAAALEHDKAYNELLEAGDNPY-ISKYNHADAVFQERL
>Rhinopholus sinicus AAV1|MF682927/48-107
LVLPGYKYLGPFNGLDKGQPVNKADDEVAREHDL EYNKLL EAGDNPY-LKYNHADQEFQEKL
>AAVpo7|KM349848.1_cds_AIU56932.1_1/44-103 [porcine AAV 7]
LVLPGYNYLGPFNGLDKGEPVNRADAVAREHDISYNEQLQAGDNPY-LKYNHADADEFQEKL
>Bovine AAV|YP_024971/44-103
LVLPGYKYLGPNGLDKGDPVNFADDEVAREHDL SYQKQLEAGDNPY-LKYNHADADEFQEKL
>California sea lion AAV1|YP_009507367/48-107
LVLPGYKYLGPFNGLERGEPVNAADAAAQRHQRQYDRILQQGGNPY-LTYNHADREFQEEL
>Goose parvovirus|NP_043515/53-112
FVLPGYKYLGPNGLDKGPPVNKADSVALEHDKAYDQQLKAGDNPY-ISKFNHADQDFIDSL
>Snake AAV|YP_068094/44-103
FVVPGYRYLGPGNSLDRGKPVNKAD EAAKKHDQEYDQQLKAGDNPY-ISKYNHADEQFQKDL
>Slow loris parvovirus1|YP_009111340.1/110-169 VP1 [Slow loris parvovirus 1]
FVVPGYKYMGPNDPDVGPPVNAADTAARDHDLRYAQMQNAGINPY-VKYNKADEKMIEEL
```

>DesmodusRotundus|MG745677/33-92  
WVWPGYKYLGPNSLDKGEPVNALDAAARLHDIGYSRLQEKGVNPY-LLYSSVDADFQSAI

>OpposumTetra|AVR53745.1/206-265 capsid protein 1 [Opposum tetraparvovirus]  
LTLPGYNYVGPNGPLDNGPPQGPVDEAAQRHDQRYDELGHGDPY-LNSHGADQMMSEEL

>Eidolon parvovirus 1|YP\_005090505.1/215-274 unnamed protein product [Eidolon helvum (bat) parvovirus]  
LLVPGYNYVGPNGPLDNGPPKGPVDEAARNHDDRYDEMLSHGDPY-LDSQGVQDQLMTKEI

>RodentTetra|AVR53743.1/220-279 capsid protein 1 [Rodent tetraparvovirus]  
LVVPGYNYVGPNGPLDNGPPQGPVDEAAKRHDERYDEMLKHGDMFY-LHGHGADGMMGKEI

>Ungulate tetraparvovirus 1|YP\_009175069.1/228-287 minor structural protein [Ungulate tetraparvovirus 1]  
LLVPGYNYVGPNGPLDNGPPQGPVDEAAKHHDERYDEMLSHGDLFY-VHGHGADRLMNKEI

>Unclassified tetraparvovirus|YP\_009315887.1/228-287 VP1 [Tetraparvovirus sp.]  
FLVPGYRYVGPNGPLDNGPPEGPVDEAAKHHDERYADMLSHGDPY-LHGHGADRLMNREI

>Human parvovirus 4|YP\_238483.1/217-276 ORF2 [Human parvovirus 4 G1]  
LTLPGYNYVGPNGPLDSGPPQGPVDEAAKHHDERYAEMIEHGDIFY-LHGHGADRLMNKEI

>Ungulate tetraparvovirus 2|ABY67707.1/220-279 minor structural protein [Porcine hokovirus]  
ILVPGYNYVGPNGPLDNAPAKGPVDEAAKHHDERYDEMLRHGDLFY-IHGRGADRLMNKEI

>Ungulate tetraparvovirus 3\_PorcineParvo2|YP\_009389279.1/278-337 gp2 protein [Ungulate tetraparvovirus 3]  
LTLPGYRYVGPNGPLDAGEPRGPVDAIAKKHDERYDELIKHGHIFY-IHGRGADTMMGKEL

>Copiparvovirus pangolin|URG17256.1/307-366 capsid protein [Copiparvovirus P229T/pangolin/2018]  
LVYPGHKYTGPGNPQDSGPPTGPIDESSQKHDLRYGALLDHGELFY-ICAKEVDKLQSRDI

>Sesavirus|YP\_009116877.1/233-292 VP1 [Sesavirus CSL10538]  
LTVPGTSYVGPNGPVPAGPPSGPVDQAALHDQRYSWLLSLGDWIFY-LLANEADKIMSDDL

>Equine parvovirus H|AUW64491.1/200-259 virion protein [Equine parvovirus H]  
LLFPGTHYLGPGNPVPPNGPPVDKLDAAAKHDIRYDAMLKHGDIFY-LKHNNWADEAMSRL

>Porcine parvovirus 6|YP\_010796330.1/414-473 capsid protein [Porcine parvovirus 6]  
FVLPSHHYTGPRNPVPAGKPADPVDESSARHDIRYGQRLKHGDWIFY-LWGKDLDNAQRDEI

>Porcine parvovirus 5|YP\_008888534.1/245-304 capsid [Porcine parvovirus 5]  
INWPGHRYTGPGNPLPHGAPRNEIDLSAAKHDIRYKQYSRYGHWIFY-IWAPYIDKKMQEDI

>Ovine copiparvovirus|QYW06846.1/131-190 MAG: capsid protein [Ovine copiparvovirus]  
LVWPGYKYLGPNGDLQQGPPVDELDAAMRHDRVYATFLSEGDIIFY-IWAPEIDKQMIKEI

>Copiparvovirus ungulate5|QVK82310.1/296-354 VP1 [Copiparvovirus ungulate5]  
LTYPGTRYVGPNGLVPAGPPVNPIDDLALQHDRLRYGTVMEHGEWIFY-IY-DESDDILAQDI

>SikaDeer copiparvovirus|BDE68838.1/316-374 structural protein [Sika deer copiparvovirus]  
LTYPGSRYIGPGNLIFYGPPTDDIDNAAALHDIRYETMISHLHWIFY-IY-DQSDDYLIEDI

>Bovine parvovirus 2|APC23635.1/92-151 structural protein [Bovine parvovirus - 2]  
LTLPKHRYVGPGGDLPAGRPMSKLDEIAARHDIGYHTEITHKHNPY-YWYNFYDEQMVKEI

>Bovine copiparvovirus 3|UQW95854.1/278-337 structural protein [Bovine copiparvovirus 3]  
IGIPGTHYIGPGSKVPGPKPTSKLDEIALHHDLGYEQLLAHGEWIFY-INYNYYDEKMIQEI

>Horse parvovirus CSF|AKN50610.1/351-411 capsid VP1 [Horse parvovirus CSF]  
WTWPGKKYCGPGNKVPCGPPKDKVDECSALHDIGYEKLIKEGKWYPYGCEGCGADSKMIECL

>Canine protoparvovirus|YP\_010797498.1/11-70 VP1 [Canine protoparvovirus]  
WVPPGYNYLGPGNTDFSIEETNQSDKAAKAHDLEYNKLLQKGQNPY-IYFNHADEDFIQAT

>Protoparvovirus primate 1|YP\_009507380.1/10-69 putative VP1 [Protoparvovirus primate1]  
WVPPGYNYLGPFNQDFSCKPTNPSDNAARKHDLEYNKLIKQGHNPY-WYNHHADEDFIKET

>Cutavirus|YP\_009508805.1/10-69 putative VP1 [Cutavirus]  
WVPPGYNFLGPFNQDFNKEPTNPSDNAAKQHDLEYNKLINQGHNPY-WYNNKADEDFIKAT

>Tusavirus 1|YP\_010796333.1/11-70 putative VP1 [Tusavirus 1]  
WVPPGYNYLGPGNDLDAGEPTNKSDAAARKHDFAYSAYLKQGLDPY-WNFNKADEKFIRDT  
>Fox parvovirus|YP\_010797208.1/12-71 VP1 [Fox parvovirus]  
WVPPGYKYLGPGNALDQGEPTNPSDAAAKEHDEAYSKYLESGKNPY-LYYPADATFIDKT  
>Megabat bufavirus|YP\_009241377.1/16-75 capsid protein VP1 [Megabat bufavirus  
1]  
WVPPGYNYLGPGNTNFKKQPTNPSDKAARNHDLEYNKILKEGQNPY-IYFNHADEDFIKAT  
>Rat bufavirus|YP\_009186841.1/11-70 VP1 [Rat bufavirus SY-2015]  
LTLPGYNYLGPGNTDFTKKPTNPSDEAARRHDLAYGSYIKKGHNPY-FNFNKADKSFIKET  
>YP\_009130651.1/11-70 capsid protein VP1 [Protoparvovirus eulipotyphla1]  
LTLPGYNYLGPGNSDFTKKPTNASDAAARKHDLAYGSYLKKGHNPY-INFNNADKTFIKDT  
>Minute virus of mice|NP\_041244.1/12-71 hypothetical protein MMVgp3 [Minute  
virus of mice]  
WVPPGYKYLGPNSLDQGEPTNPSDAAAKEHDEAYDQYIKSGKNPY-LYFSAADQRFIDQT  
> Newlavirus|YP\_010805432.1/11-70 VP1 [Newlavirus]  
WVPPGYKYLGPNSLDKGTSPNPSDAAQRHDAHAYSAYQAAGFNPY-FYHNQADENFIRDT
